# Supplementary material for: Hepatitis B screening among Chinese Americans: a structural equation modeling analysis
Source: PubMed Central journal article supplement (PMC4357149; doi:10.1186/s12879-015-0854-7), 2015-03-08
Supplement: 12879_2015_854_MOESM1_ESM.pdf [file 12879_2015_854_MOESM1_ESM.pdf]

### Hepatitis-B Client Survey

1. Were you screened for Hepatitis B- Liver Cancer ?

- \_\_\_\_\_ 1) I was never screened
- \_\_\_\_\_ 2) Within last 12 months
- \_\_\_\_\_ 3) Within 2.5 years
- \_\_\_\_\_ 4) Over 5 years

2. What are the barriers that you have encountered when you taking screening for Hepatitis B? (**Check all barriers that apply**)

- \_\_\_\_\_ 1) Lack of knowledge
- \_\_\_\_\_ 2) I feel well, no health problems
- \_\_\_\_\_ 3) Language problem
- \_\_\_\_\_ 4) I do not have a regular doctor to see.
- \_\_\_\_\_ 5) I have no time to do it
- \_\_\_\_\_ 6) I did not know where to get services
- \_\_\_\_\_ 7) No transportation to the facility
- \_\_\_\_\_ 8) I have no insurance to cover the cost
- \_\_\_\_\_ 9) My insurance does not cover the cost
- \_\_\_\_\_ 10) Fear of a getting a bad test result
- \_\_\_\_\_ 11) Embarrassment/Shame

3. Do you have a primary health care provider to go to when you are sick?

- \_\_\_\_\_ 1) No
- \_\_\_\_\_ 2) Yes

4. Based on your experience with getting medical care, how would you rate the following?

|                                                                                             | Poor | Fair | Good | Very Good | Excellent |
|---------------------------------------------------------------------------------------------|------|------|------|-----------|-----------|
| 1) Access to medical care whenever needed                                                   |      |      |      |           |           |
| 2) Arrangements for making appointments for medical care                                    |      |      |      |           |           |
| 3) Length of time waiting to see doctor at the office                                       |      |      |      |           |           |
| 4) Length of time you wait between making an appointment for care and the day of your visit |      |      |      |           |           |
| 5) Ability to contact a doctor after hours and on weekends                                  |      |      |      |           |           |
| 6) Access to specialty care if you need it                                                  |      |      |      |           |           |
| 7) Access to medical care in an emergency                                                   |      |      |      |           |           |
| 8) Convenience of location of the doctor's office                                           |      |      |      |           |           |
| 9) Hours when the doctor's office is open                                                   |      |      |      |           |           |
| 10) Availability of medical information or advice by phone                                  |      |      |      |           |           |
| 11) Overall, how would you rate care at your medical group                                  |      |      |      |           |           |
| 12) Quality of Care from your physician                                                     |      |      |      |           |           |

Grace Ma, Ph.D., Principal Investigator, Center for Asian Health, Temple University

5. What year were you born? \_\_\_\_\_
6. What is your gender? \_\_\_\_\_1) Male \_\_\_\_\_2) Female
7. Were you born in the U.S? \_\_\_\_\_1) No \_\_\_\_\_2) Yes
8. How many years have you lived in the U.S.? \_\_\_\_\_ years
9. What is your current marital status?  
\_\_\_\_1) Married  
\_\_\_\_2) Never married  
\_\_\_\_3) Divorced/Separated  
\_\_\_\_4) Widower
10. How many years of education have you completed? \_\_\_\_\_ years.  
  
What is the highest grade of school you completed? (**Check one below**)  
\_\_\_\_1) Non education or elementary school  
\_\_\_\_2) Below high school graduate  
\_\_\_\_3) High school  
\_\_\_\_4) University (or college or some college, or associate degree)  
\_\_\_\_5) Graduate and above
11. Which of the following describes you currently?  
\_\_\_\_1) Employed  
\_\_\_\_2) Unemployed  
\_\_\_\_3) Retired  
\_\_\_\_4) Homemaker  
\_\_\_\_5) Student
12. What is your annual household income?  
\_\_\_\_1) Less than \$10,000  
\_\_\_\_2) \$10,000-\$20,000  
\_\_\_\_3) \$20,000-\$30,000  
\_\_\_\_4) \$30,000-\$40,000  
\_\_\_\_5) Above \$40,000
13. Do you currently have health insurance? \_\_\_\_\_1) No \_\_\_\_\_2) Yes
14. Do you have a regular physician to visit? \_\_\_\_\_1) No \_\_\_\_\_2) Yes  
*(note, the article used "primary physician" instead of regular physician)*
15. How well do you think you speak English?  
\_\_\_\_1) not at all \_\_\_\_\_2) not well \_\_\_\_\_3) well \_\_\_\_\_4) very well
16. Do you usually speak your native Asian language at home?  
\_\_\_\_1) No  
\_\_\_\_2) Yes (Circle one language: Chinese, Korean, Vietnamese, Cambodian,  
other\_\_\_\_\_)

Grace Ma, Ph.D., Principal Investigator, Center for Asian Health, Temple University

17. Do you often use the Internet for sources of information? \_\_\_\_\_ 1) No \_\_\_\_\_ 2) Yes

If your answer is Yes, which language do you primarily use:

- \_\_\_\_\_ 1) Chinese
- \_\_\_\_\_ 2) Vietnamese
- \_\_\_\_\_ 3) Korean
- \_\_\_\_\_ 4) Cambodian
- \_\_\_\_\_ 5) English
- \_\_\_\_\_ 6) Other (Please specify) \_\_\_\_\_

18. How many times have you visited your current primary physician in the last 12 months?

- \_\_\_\_\_ 1) Never visited
- \_\_\_\_\_ 2) 1-2 times
- \_\_\_\_\_ 3) 3-4 times
- \_\_\_\_\_ 4) 5 or more times
